# Supplementary material for: Management of immune-related cutaneous adverse events with dupilumab
Source: HighWire-hosted journal article supplement (doi:10.1136/jitc-2023-007324), 2023-06-01
Supplement: jitc-2023-007324supp001_data_supplement.pdf [file jitc-2023-007324supp001_data_supplement.pdf]

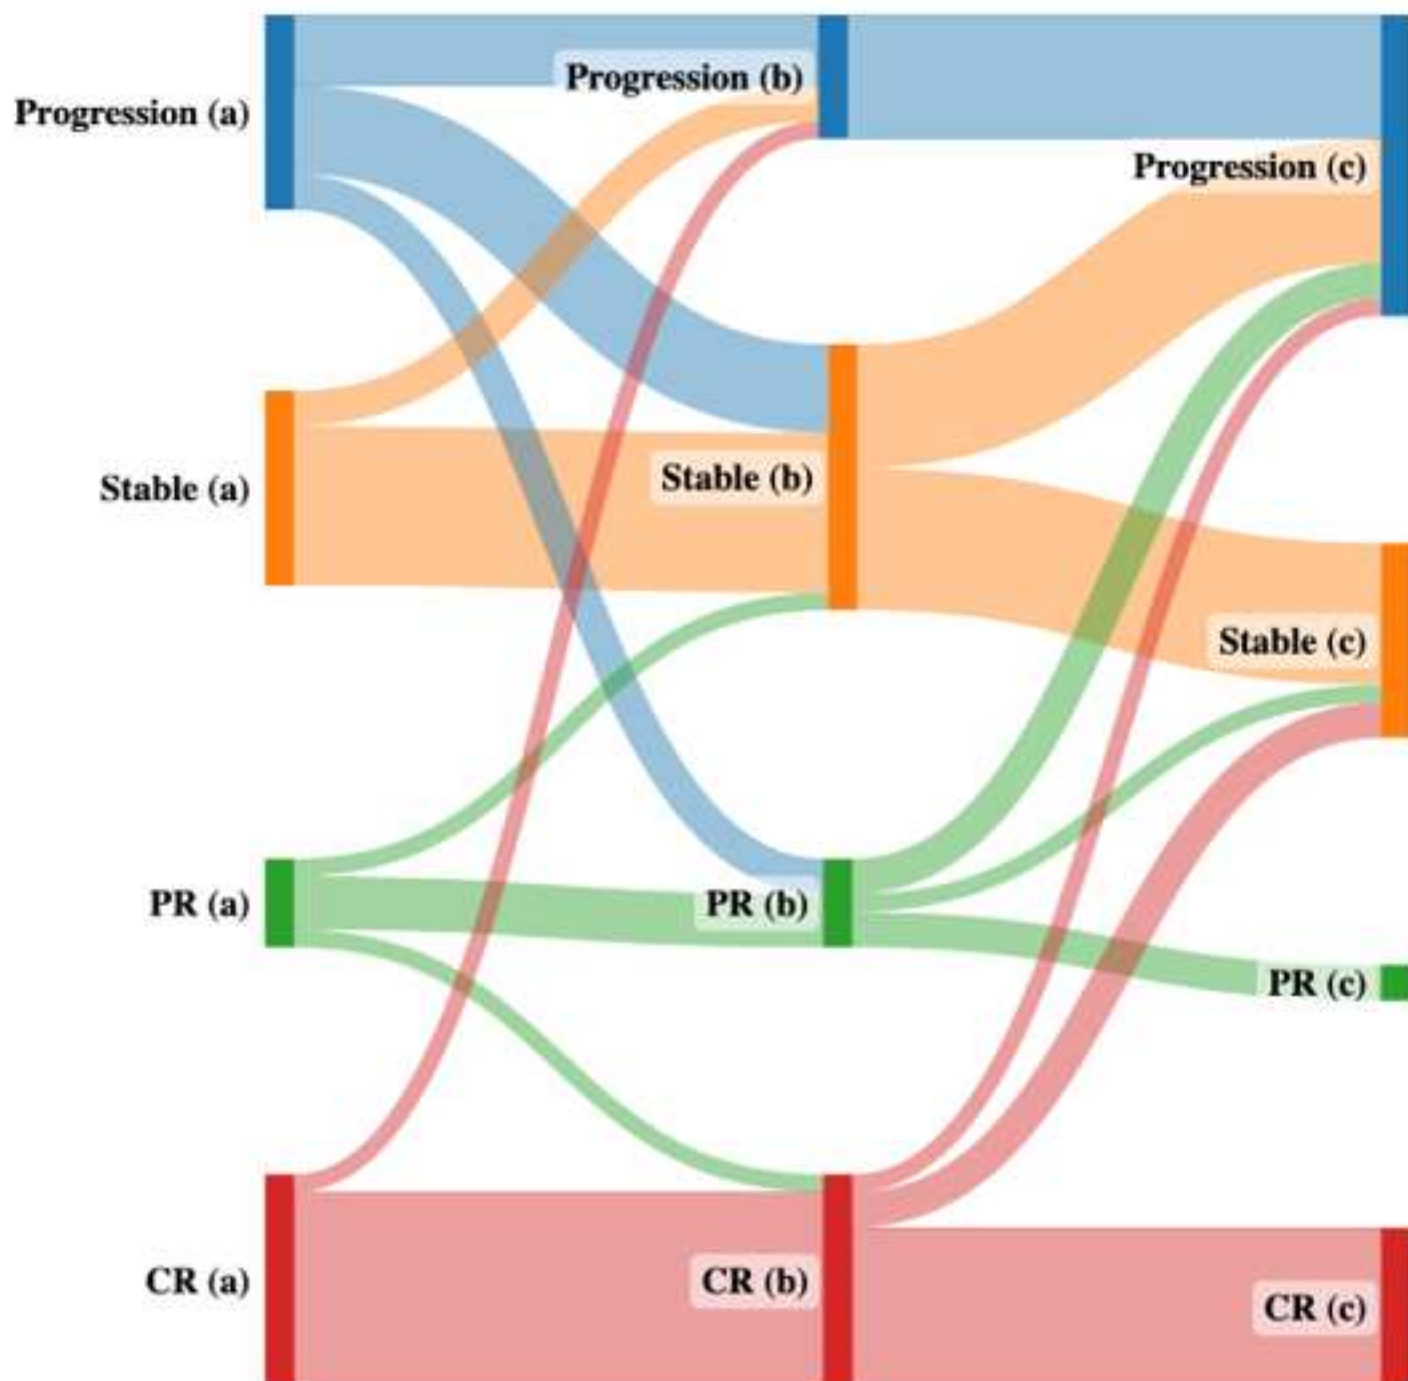

Supplemental Figure. Patient cancer status a) prior to dupilumab initiation, b) 90 days after dupilumab initiation, and c) at the most recent follow up. CR = complete response of tumor to antineoplastics; PR = partial response of tumor to antineoplastics.
